# 1 **Clinical Pattern and Outcome of Patients with Acute Kidney Injury in the Emergency**

## 2 **Department of Saint Paul`s Hospital Millennium Medical College**

3 **Berihu Assefa<sup>1\*</sup>, Yemane Gebremedhin<sup>2</sup>, Benyam Bahta<sup>2</sup>, Frehiwot Worku<sup>3</sup>, Dirijit Mamo<sup>2</sup>, Menbeu**  
4 **Sultan, Mohammed Kalifa<sup>2</sup>**

5 <sup>1</sup>Department of Emergency Medicine and Critical Care, Mekelle University College of Health Sciences, Ayder  
6 Comprehensive Specialized Hospital, Mekelle, Tigray, Ethiopia

7 <sup>2</sup>Department of Emergency Medicine and Critical Care, Saint Paul`s Hospital Millennium Medical College,  
8 Addis Ababa, Ethiopia

9 <sup>3</sup>Department of Public Health, Saint Paul`s Hospital Millennium Medical College, Addis Ababa, Ethiopia

10 \*Corresponding Author: Email: [Berihuassfa20188@gmail.com](mailto:Berihuassfa20188@gmail.com)

11 **ORCID iD 000-0001-5827-9065**

## 12 **Abstract**

13 **Background:** Worldwide, 13.3 million people experience Acute Kidney Injury (AKI) each year. 85% of  
14 individuals impacted are thought to reside in underdeveloped nations. AKI continues to be one of the most  
15 widespread diseases in the world, although little is known about its clinical profile or outcome. The ability to  
16 pinpoint particular causes enables the implementation of targeted therapy and the development of  
17 preventative measures.

18 The main goal of this study was to identify the patterns and outcomes of patients with AKI in the emergency  
19 department of Saint Paul's Hospital Millennium Medical College (SPHMMC).

20 **Method and materials:** A cross-sectional study was conducted at the emergency department of SPHMMC  
21 in Addis Ababa, Ethiopia, from June 1-2021 to June 1-2022. Google Forms was used to collect the data,

22 which was then cleaned up in Microsoft Excel before being sent to SPSS version 25 for analysis. To evaluate  
23 demographic, clinical profile, and outcome determinants, descriptive statistics, and binary logistic regression  
24 analysis were utilized. A paired samples T-test was used to compare the patient's laboratory findings at  
25 admission and discharge.

26 **Results:** Among the 222 AKI patients included in the study 110 (49.5%) were males and 112 (50.5%) were  
27 females. The mean age of presentation was  $48 \pm 18$  years old. The majority of patients were from Addis Ababa  
28 (41.4%) and the Oromia region (40.5%). The most common causes of AKI were infections (26.2%), acute  
29 glomerulonephritis (20.4%), volume depletion (18.5%), and obstructive uropathy (16.6%). Uremic  
30 encephalopathy, infection, malignancy, potassium at discharge from emergency, and low initial Glasgow  
31 coma scale (GCS) significantly contributed to the death. The presence of nephrotoxic antibiotics, infection,  
32 and hyponatremia significantly contributed to the admission rate to the wards and intensive care unit (ICU).

33 **Conclusion:** In conclusion, infection is the dominant cause and mortality predictor of AKI at SPHMMC. The  
34 majority of patients with infections were sepsis (78.1%), pyelonephritis (11.4%), and pneumonia (10.3%).  
35 Early initiation of antibiotics in the emergency is better for a good outcome.

36 **Keywords:** Acute kidney injury, pattern, outcome, emergency department, SPHMMC

## 37 **Background**

38 Acute kidney injury is defined as a decline in renal function over hours or days resulting in the accumulation  
39 of toxic wastes and the loss of internal homeostasis. AKI is defined according to the Kidney Disease  
40 Improving Global Outcomes (KDIGO) 2012 criteria as an increase in serum creatinine (Scr) by  $\geq 0.3$  mg/dl  
41 within 48 hours, or an increase in Scr to  $\geq 1.5$  times baseline within the prior 7 days, and urine volume  $< 0.5$   
42 mL/ kg/h for 6 hours (1).

43 The baseline serum creatinine used for hospital-acquired AKI is the first documented serum creatinine on  
44 admission. For community-acquired AKI, a Prehospital record of creatinine within seven days to three months  
45 of hospital admission, whichever is available, or the minimum and/or most recent value of admission serum  
46 creatinine is used as baseline (2).

47 The acute kidney injury network (AKIN) proposed in 2007, AKI is a decline in kidney function during 48 h as  
48 demonstrated by an increase in serum creatinine of more than 0.3 mg/dl, an increase in serum creatinine of  
49 more than 50 %, or the development of oliguria (3-7).

50 AKI affects approximately 13.3 million individuals globally per year. An estimated 85% of those affected live  
51 in the developing world. AKI is thought to contribute to about 1.7 million deaths every year (8, 9).

52 Acute kidney injury (AKI) is a challenging problem in Africa because of the high burden of infectious diseases,  
53 the late presentation of patients to healthcare facilities, and the lack of resources to support patients with  
54 established AKI (10, 11).

55 The clinical importance of AKI is exemplified by data showing a consistent association with increased long-  
56 term risk of poor outcomes, including death, incident chronic kidney disease (CKD), and greater utilization of  
57 health resources. AKI is a common complication of critical illness, with some research showing that as high  
58 as 1 in 5 adults experience AKI per hospital admission. The clinical and public health importance of AKI is

59 well established due to its association with high mortality and its separate independent effect on the risk of  
60 death and resource use (12).

61 The International Society of Nephrology conducted a "Global Snapshot" about AKI in 2014, where most cases  
62 (45%) were from low and lower-middle-income countries. However, these data may be incomplete, since  
63 many of the low-income nations lack the resources to maintain national disease registries, and it is  
64 challenging to accurately report cases of AKI outside of major health centers. The incidence of AKI in Low-  
65 income countries is not completely understood the proposed reasons being a late presentation of patients to  
66 tertiary centers, underreporting, and a reduced capacity to provide intensive care to severely ill patients(13).

## 67 **Objectives**

68 General objective

69 To assess the pattern and outcome of acute kidney injury patients in emergency of SPHMMC from June 1-  
70 2021 to June 1-2022.

71 Specific objectives

- 72 • To determine clinical characteristics of AKI in the emergency department of SPHMMC from June 1-  
73 2021 to June -2022.
- 74 • To explore management practice for AKI patients in the emergency department of SPHMMC, Addis  
75 Ababa, Ethiopia from June 1-2021 to June 1-2022.
- 76 • To determine the clinical outcome of AKI in SPHMMC emergency from June 1-2021 to June 1- 2022.

## 77 **Methods and Materials**

### 78 **Study area**

79 This study was conducted at the emergency of SPHMMC, which is located in Addis Ababa the capital city of  
80 Ethiopia. The hospital was established in 1968 by the late Emperor Haile Selassie as Saint Paul's Hospital.

81 It is a specialized teaching hospital located in the northwestern part of Addis Ababa, the capital of the country.  
82 Its catchment population is well over 7 million, making it one of the largest referral centers in the country. As  
83 a tertiary center, it receives patients from every corner of the country, most of whom come from the central  
84 areas of the country.

85 In 2010, the hospital was advanced to a medical school, through the decree of the national council of the  
86 ministries, and with this, it attained its current name: then got the name, Saint Paul's Hospital Millennium  
87 Medical College (SPHMMC). Being one of the leading tertiary and teaching hospitals in the country,  
88 SPHMMC has around 250 faculty members and more than 2800 clinical, academic, administrative &  
89 supportive staff. While its inpatient capacity is more than 700 beds, the hospital gives service to an average  
90 of 1200 emergency and outpatient clients daily. The hospital serves as a teaching institution for  
91 undergraduate and postgraduate medical students and is a research center (14).

92 The department of emergency and critical care is in charge of its adult emergency. Eight nephrologists work  
93 for the nephrology unit, which also offers fellowships. The first and only living-related kidney transplant  
94 program was established in September 2015 in collaboration with the University of Michigan (15). The ICU,  
95 the kidney transplant department, and the first floor of the maternity block all have areas for dialysis at the  
96 hospital.

## 97 **Study design**

98 Hospital-based cross-sectional study over one year was conducted by reviewing the charts of patients  
99 admitted and diagnosed to have AKI in the emergency department of SPHMMC from June 1-2021 to 1- June  
100 2022.

## 101 **Study period & duration**

102 Data collection was carried out from August 1-2022 to September 1-2022 for patients who has been seen at  
103 the emergency from June 1-2021 to June 1- 2022.

## 104 **Population**

### 105 **Source population**

106 Records of all patients admitted to the emergency department of SPHMMC from Jun 1-2021 to Jun 1- 2022.

### 107 **Study population**

108 All patients with acute kidney injury presented to the emergency department of SPHMMC from June 1-2021  
109 to June 1-2022. 222 patients were included in this study.

### 110 **Eligibility criteria**

#### 111 **Inclusion criteria**

112 Patients who were presented to the emergency department of SPHMMC and diagnosed to have acute kidney  
113 injury from Jun 1-2021 to Jun 1-2022 were eligible and included in this study.

#### 114 **Exclusion criteria**

115 Those patients with incomplete chart records, established chronic kidney disease (CKD), age under 14 years  
116 old, AKI on CKD, multiple admissions during the study period were excluded.

### 117 **Sample size determination and sampling procedure**

#### 118 **Sample size determination**

119 A simple random sampling technique was employed to select 222 patients from the total of 504 AKI patients  
120 who were estimated to be seen over a year. For this study, the medical records of sampled patients that fulfill  
121 the inclusion criteria and were presented to the emergency department of SPHMMC from June 1-2021 to  
122 June 1- 2022 were reviewed.

123 The following assumptions were considered in calculating the sample size. P value is taken as 0.3 (a mortality  
124 rate of AKI patients in a study done in the same city and the same setting) (16). And 95% confidence interval  
125 was used, with a 5% margin of error tolerated; the sample size was determined by using single population  
126 proportion formula to have the final sample size of 222 patients.

## 127 **Study variable**

### 128 **Dependent variables**

129 Outcome

- 130 ✓ Death
- 131 ✓ Admitted to wards, ICU, or
- 132 ✓ Discharged improved

### 133 **Independent variables**

- 134 ✓ Age
- 135 ✓ Sex
- 136 ✓ Etiology
- 137 ✓ Precipitating factors
- 138 ✓ Other co-morbidities (HTN, DM, BPH, pelvic tumors, cardiac disease)
- 139 ✓ medications

### 140 **Operational definition**

141 **Outcome:** conditions of patients written on patients' chart at discharge time from emergency (admitted to  
142 ward or ICU, death, transferred to another hospital, discharged home).

143 **Admission:** is transferring of a patient from ER to the ward or ICU

144 **Disease Pattern:** a factor determining and influencing the frequency and distribution of disease, injury, and  
145 other health-related events and their cause in a defined human population at admission.

146 **Acute kidney injury:** Acute kidney injury is defined as a decline in renal function over hours or days resulting  
147 in the accumulation of toxic wastes and the loss of internal homeostasis. (17)

148 **Adult-** refers to individuals above the age group of 14, which is the cut of age for patients to be seen by an  
149 emergency department (ED) physician at SPHMMC.

### 150 **Data Collection Procedures**

151 Data was collected from all eligible acute kidney injury patients' charts using a structured checklist by google  
152 form. All sampled acute kidney injury patients' data were collected from the SPHMMC registration logbook,  
153 patients' charts, Health Management Information System (HMIS), referral papers, and death reports. Patient  
154 charts and referral papers were reviewed for the age of patients, sex, comorbid illness, medications history,  
155 clinical presentation, interventions provided in the hospital, the outcome of patients after the treatment,  
156 complications, length of stay, and for other necessary data using a structured checklist in the google form.  
157 The checklist was prepared from the articles in the literature review, and guidelines on AKI. The data  
158 collection tool was prepared in the English language by and was filled by well-oriented SPHMMC emergency  
159 and critical care medicine resident physicians who were not involved in the management of the patients.

### 160 **Data quality management**

161 One week before data collection, a 10% pretested was utilized to gather data. However, the checklist needed  
162 to be modified to incorporate a few factors. Before starting the data-collecting procedure, the data collectors  
163 received training on how to collect data. Close monitoring was kept throughout the data collection process,  
164 and the primary investigator and data collectors double-checked full checklists each day to ensure  
165 consistency and completeness before analysis.



## 166 **Data processing and analysis**

167 After being exported from Google Forms, the data were cleaned up and edited in Microsoft Excel. The IBM  
168 SPSS (Statistical Package for Social science) version 25 was then used for data entry, code clearance, and  
169 analysis. To look for missing values and variables, frequency and cross-tabulation were utilized. Using  
170 descriptive statistics like mean, percentage, frequency, and standard deviation, the demographic and clinical  
171 features of the patients were calculated. Paired binary and t-test to identify relationships between  
172 independent and dependent variables, logistic regression was performed. Diagrams, tables, and figures are  
173 used to present the study's findings, as seen in the outcome section.

## 174 **Results**

### 175 **Demographic, and clinical characteristics of patients**

176 Of 222 AKI patients identified 112(50.5%) were female patients. The maximum age of the patient identified  
177 was 90 years old, and the minimum age identified was 15 years. Most of the patients 173 (77.9%) were less  
178 than 65 years. Most of patients were from Addis Ababa 92(41.4%) followed by Oromia region 90(40.5%).  
179 More than two third (77.5%) of patients were referred from government health facilities. Whereas, 12.6% of  
180 patients were referred from private health facilities. The rest 9.9% of patents were self-referral. All the self-  
181 referred patients were from Addis Ababa and Oromia region. See Table 1.

182 Table 1. Demographic characteristic of AKI patients presented to the ED of SPHMMC from June 2021 to June 2022.

| Demographic characteristics | Sub-variables | Frequency | Percent |
|-----------------------------|---------------|-----------|---------|
| Age groups                  | 14-24         | 24        | 10.8    |
|                             | 25-34         | 29        | 13.1    |
|                             | 35-44         | 44        | 19.8    |

|                       |                            |     |      |
|-----------------------|----------------------------|-----|------|
|                       | 45-54                      | 39  | 17.6 |
|                       | 55-64                      | 37  | 16.7 |
|                       | >64                        | 49  | 22.1 |
| Address               | Addis Ababa                | 92  | 41.4 |
|                       | Amhara                     | 16  | 7.2  |
|                       | Oromia                     | 90  | 40.5 |
|                       | SNNPR                      | 18  | 8.1  |
|                       | Others                     | 6   | 2.7  |
| Patient referred from | Self-referral (home)       | 22  | 9.9  |
|                       | Government health facility | 172 | 77.5 |
|                       | Private health facility    | 28  | 12.6 |
| Sex                   | Male                       | 110 | 49.5 |
|                       | Female                     | 112 | 50.5 |

183 **AKI-** Acute Kidney Injury, **ED-** Emergency Department, **SNNPR-** Southern Nations Nationalities and Peoples Region, **SPHMMC-** St. Paul's  
 184 Hospital Millennium Medical College

185 From the total 222 AKI patients presented to the adult emergency, the majority 141 (63.5%) were triaged to  
 186 yellow-green, 60 (27.3%) were triaged to orange and 21 (9.46%) were triaged to red area of the emergency.

187 Of all the patients presented with normal range blood pressure was 112(50.3%). And 26 patients (11.6%)  
 188 and 72 patients (32.4%) were in the hypotensive and hypertensive range respectively. Only 12 (5.3%) were  
 189 presented with hypertensive crises.

190 More than three-fourths of patients presented with normal temperature, whereas 13.4% had a record of fever  
 191 on presentation. Most patients had random blood sugar (RBS) of 140-180 (58.9%) and 24.7% of patients  
 192 with AKI presented with RBS of greater than 180 mg/dl. Only 1.3% of patients had hypoglycemia on  
 193 presentation to the emergency. See Table 2.

194 Table 2. Distribution of vital signs of AKI patients presented to the ED of SPHMMC from June 2021 to June 2022.

| Vital Signs                                | Male      | Female    | Total |
|--------------------------------------------|-----------|-----------|-------|
|                                            | N (%)     | N (%)     | %     |
| <b>Blood Pressure (BP)</b>                 |           |           |       |
| <90/60                                     | 13 (5.8)  | 13 (5.8)  | 11.6  |
| 90/60-130/80                               | 54 (24.3) | 58 (26)   | 50.3  |
| 131/81-180/120                             | 38 (17.1) | 34 (15.3) | 32.4  |
| >180/120                                   | 5(2.2)    | 7 (3.1)   | 5.3   |
| <b>Peripheral Oxygen Saturation (SPO2)</b> |           |           |       |
| >90%                                       | 70 (31.5) | 62 (27.9) | 59.4  |
| 86-90%                                     | 3 (1.3)   | 10 (4.5)  | 5.8   |
| <85%                                       | 37 (16)   | 40 (18)   | 34    |
| <b>Pulse Rate (PR)</b>                     |           |           |       |
| <60beats per minute<br>(bpm)               | 4 (1.8)   | 0         | 1.8   |

|                                 |           |           |      |
|---------------------------------|-----------|-----------|------|
| 60-100bpm                       | 60 (27)   | 60 (27)   | 54   |
| >100bpm                         | 46 (20.7) | 52 (23.4) | 44   |
| <b>Respiratory Rate (RR)</b>    |           |           |      |
| <12                             | 1 (0.4)   | 1 (0.4)   | 0.8  |
| 12-22                           | 72 (32.4) | 60(27)    | 59.4 |
| 23-35                           | 37 (16.6) | 51 (22.9) | 39.5 |
| >35                             | 0         | 1(0.4)    | 0.4  |
| <b>Temperature</b>              |           |           |      |
| 36.5-38                         | 94 (42.3) | 97 (43.6) | 85.9 |
| >38                             | 15(6.7)   | 15(6.7)   | 13.4 |
| <b>Random Blood Sugar (RBS)</b> |           |           |      |
| <70                             | 3 (1.3)   | 0         | 1.3  |
| 70-140                          | 18(8.1)   | 14(6.3)   | 14.4 |
| 141-180                         | 64(28.8)  | 67(30.1)  | 58.9 |
| >180                            | 24(10.8)  | 31(13.9)  | 24.7 |

195 **Comorbid conditions**

196 The most common premorbid condition identified was hypertension (27.2 %), followed by malignancy  
 197 (24.79%) and diabetes mellitus (19%). Heart failure and Human Immunodeficiency Virus (HIV) account for  
 198 14% and 8.2% respectively.

199 **Causes and clinical presentation**

200 The commonest causes of AKI were infection 71 (26.2 %), followed by acute glomerulonephritis 53 (20.4%).  
201 Acute glomerulonephritis was not a biopsy, rather a clinical diagnosis with the signs and symptoms and urine  
202 analysis as documented by the treating physician. 81% of the patients were fully conscious (GCS=15/15)  
203 and 18% had moderately altered mental status (GCS of 9-14). The rest 0.9% of patients presented with coma  
204 (GCS=<8) at presentation to the emergency. See Figure 1 below.

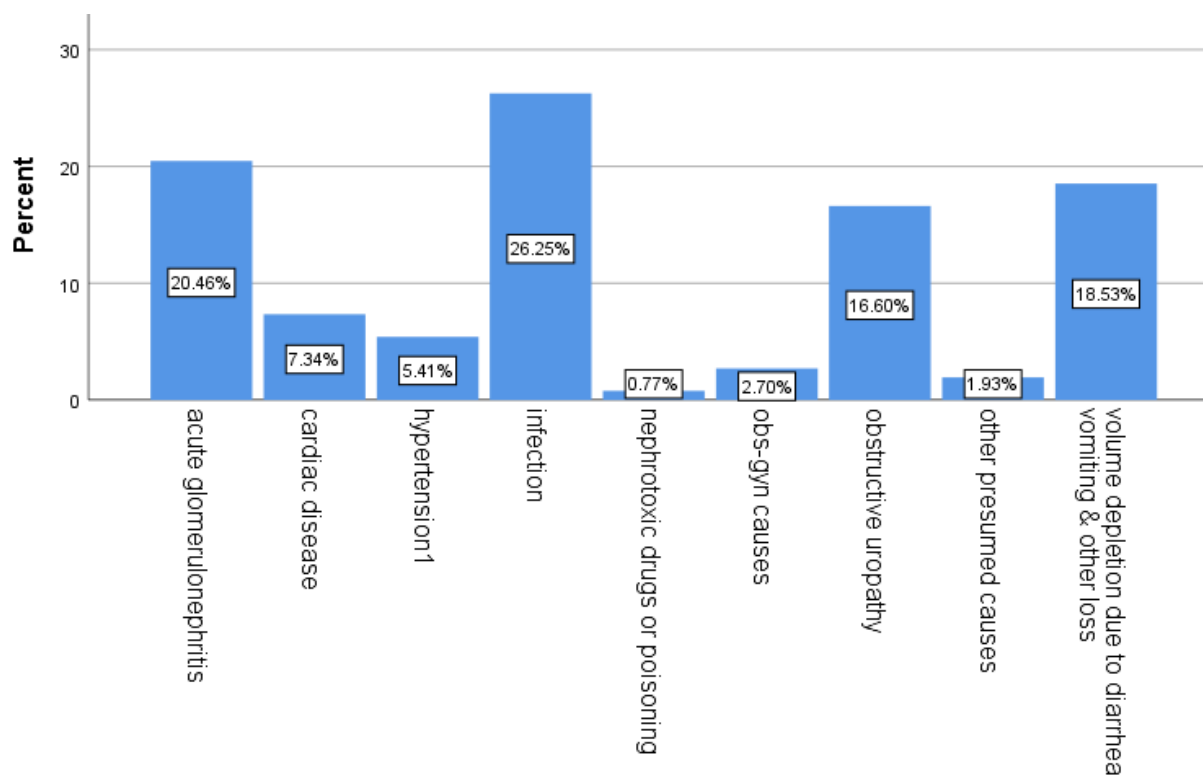

205  
206 Figure 1: Presumed causes of AKI patients presented to the ED of SPHMMC from June 2021 to June 2022.  
207 The commonest presenting features of AKI were shortness of breath 46 (20.7 %), followed by body edema  
208 44 (19.8 %), decreased urine output 43 (19.3 %), and 13.1 % of AKI patients. See Figure 2 below.

209  
210

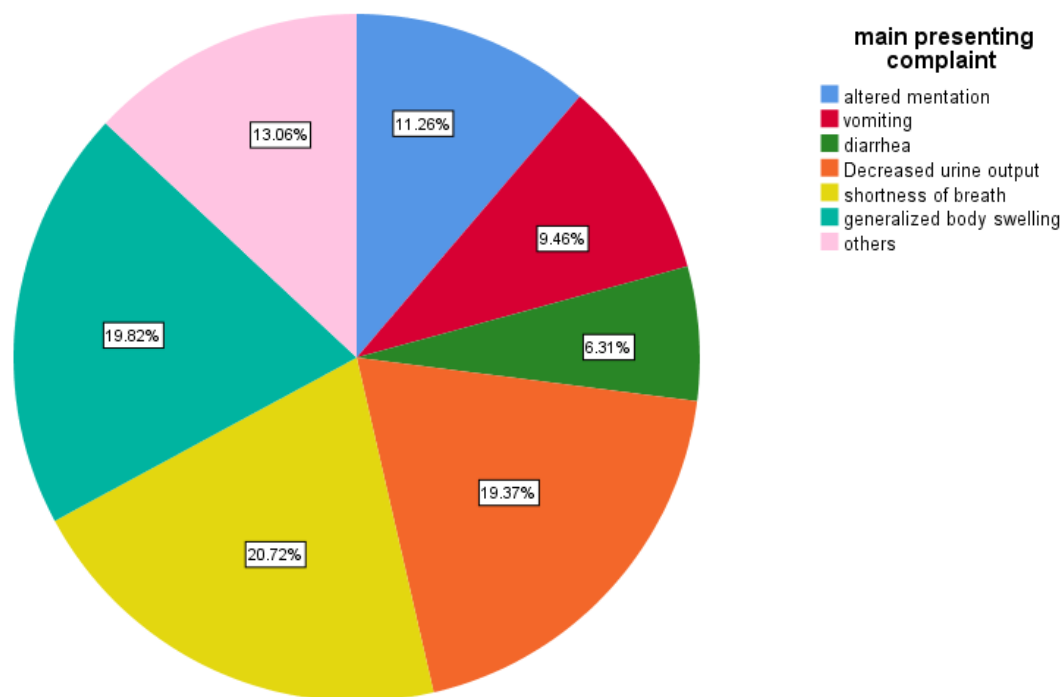

211

212 Figure 2: Main presenting complaint of AKI patients presented to the ED of SPHMMC from June 2021 to June 2022.

213 The most common nephrotoxic drugs traced were antibiotics 28.4% (vancomycin and gentamycin) and

214 immunosuppressive drugs (17.8%) consisting of most anti-cancer drugs like cisplatin. See Table 3 below.

215 Table 3: List of nephrotoxic drugs in AKI patients presented to the ED of SPHMMC from June 2021 to June 2022.

| Nephrotoxic drugs |                         |    |         |
|-------------------|-------------------------|----|---------|
|                   |                         | N  | Percent |
| Nephrotoxic drugs | Antibiotics             | 50 | 28.4%   |
|                   | NSAIDs                  | 34 | 19.3%   |
|                   | Diuretics               | 29 | 26.5%   |
|                   | Immunosuppressive drugs | 49 | 17.8%   |
|                   | ACEI                    | 14 | 8.0%    |

216 **ACEI-** Angiotensin Converting Enzyme Inhibitors, **NSAIDs-** Nonsteroidal Anti-Inflammatory Drugs

217 The most common causes of obstructive uropathy were nephrolithiasis 37.7%, BPH accounting for 35.5%,  
218 and malignancy holding 26.6% of all obstructive causes.

219 Regarding the focus of infection, sepsis accounts for 78.1% of all infection causes, pyelonephritis 11.4%, and  
220 pneumonia consist of 10.3%.

221 Most of the patients (81.3%) had a duration of complaint of two days to two weeks, and 13.6% had more than  
222 two weeks duration of complaint.

### 223 **Laboratory investigation results**

224 Out of 222 cases, one hundred thirty-seven (61.7%) had normal white blood cell (WBC) on presentation to  
225 the emergency, and seventy-five (33.8%) had leukocytosis.

226 One hundred twenty-six (56.6%) had normal range hemoglobin, and 43.4% of patients were anemic at  
227 presentation to the emergency. One hundred- eighty eight (84.5%) patients had elevated initial creatinine,  
228 and 137 (61.7%) patients had normal range potassium. Hundred-three (46.4%) patients presented with  
229 hyponatremia. See Table 4 below.

230 Table 4: Initial Investigation of AKI patients presented to the ED of SPHMMC from June 2021 to June 2022.

| <b>Variable</b>               | <b>Male</b> | <b>Female</b> | <b>Total</b> |
|-------------------------------|-------------|---------------|--------------|
| <b>Hemoglobin Level (Hgb)</b> |             |               |              |
| Mild anemia                   | 14(6.3%)    | 22(9.9%)      | 31(16.2%)    |
| Moderate anemia               | 21(9.4%)    | 28(12.6%)     | 49(22%)      |
| Severe anemia                 | 4(1.8%)     | 7(3.1%)       | 11(4.9 %)    |

|                             |           |           |             |
|-----------------------------|-----------|-----------|-------------|
| Normal                      | 71(31.9%) | 55(24.7%) | 126(56.6%)  |
| <b>WBC</b>                  |           |           |             |
| Leukocytosis                | 36(16.2%) | 39(17.5%) | 75(33.7%)   |
| Leukopenia                  | 4(1.8%)   | 6(2.7%)   | 10(4.5%)    |
| Normal range                | 70(31.5%) | 67(30.1%) | 137(61.6%)  |
| <b>Platelet</b>             |           |           |             |
| Normal platelet             | 48(21.6%) | 58(26.1%) | 120(47.7%)  |
| Thrombocytopenia            | 55(24.7%) | 47(21.1%) | 102(65.8%)  |
| Thrombocytosis              | 7(3.1%)   | 7(3.1%)   | 14(6.2%)    |
| <b>Creatinine</b>           |           |           |             |
| Normal                      | 17(7.6%)  | 17(7.6%)  | 34(15.2%)   |
| Elevated                    | 93(41.8%) | 95(42.7%) | 188(84.5%)  |
| <b>Serum Potassium (K+)</b> |           |           |             |
| Normal                      | 68(30.6%) | 69(31%)   | 137(61.7%)  |
| Hypokalemia                 | 11(4.9%)  | 10(4.5%)  | 21(9.4%)    |
| Hyperkalemia                | 31(13.9%) | 33(14.8)  | 64(28.7%)   |
| <b>Serum Sodium (Na+)</b>   |           |           |             |
| 135-145                     | 53(23.8%) | 51(22.9%) | 104(46.8%)  |
| >145                        | 7(3.1%)   | 8(3.6%)   | 15(6.8%)    |
| < 135                       | 50(22.5%) | 53(23.8%) | 103 (46.4%) |



231 The patients had complete blood counts, selected electrolytes, and renal function tests during admission and  
232 upon discharge. Most of the patients (84.5%) presented to emergency with elevated creatinine. Only 15.2%  
233 of the AKI patients presented with normal creatinine and developed AKI in the hospital.

234 The mean white cell count is  $12219.50 \pm 10385.291$  and  $13689.46 \pm 21444.763$  on admission and discharge  
235 respectively. There was good decrement of creatinine upon discharge from a mean of  $4.54 \pm 4.73$  to  $3.6 \pm 3.81$

236 Table 5. Laboratory values of AKI patients presented to the ED of SPHMMC from June 2021 to June 2022.

| Laboratory Results                 | Mean      | Standard Deviation |
|------------------------------------|-----------|--------------------|
| Initial WBC                        | 12219.50  | 10385.291          |
| Discharge WBC                      | 13689.46  | 21444.763          |
| Initial hemoglobin                 | 11.87     | 2.880              |
| Discharge hemoglobin               | 11.462    | 2.6642             |
| Initial platelet                   | 263936.94 | 123036.669         |
| Discharge platelet                 | 273783.33 | 153007.077         |
| Initial blood urea nitrogen ( BUN) | 108.63    | 95.476             |
| Discharge BUN                      | 92.50     | 84.927             |
| Initial Creatinine                 | 4.5456    | 4.73147            |
| Discharge Creatinine               | 3.608     | 3.8136             |
| Initial K+                         | 4.748     | 1.1873             |
| Discharge K+                       | 4.458     | .9375              |
| Initial Na+                        | 134.50    | 8.953              |

|               |        |       |
|---------------|--------|-------|
| Discharge Na+ | 136.03 | 7.496 |
|---------------|--------|-------|

237

---

238 **Treatment, duration of stay, and complications**

239 More than half (62.1%) received conservative management of drugs, fluids, and urinary catheterization.

240 Around 16% of patients received additional operative management for underlying disease condition. Most of

241 the AKI patients (68.0%) stayed in ED for 1-5 days, 30.1% stayed more than 5 days & 1.8 % of patients

242 stayed less than a day.

243 Hemodialysis was given for 52 (23.4%) of patients. The identified indications for dialysis were refractory fluid

244 overload (57.6%), uremic complications (30.7%), and refractory hyperkalemia (11.5%).

245 The most common complication identified in the ED was hyponatremia accounting for 32.5%, hyperkalemia

246 at 22.7%, pulmonary edema at 18.7%, uremic gastropathy at 12.1%, other complications at 7.4 %, and uremic

247 encephalopathy 6.3 % respectively.

248 Almost half of the patients (50.9%) were admitted to the ward or ICU, one-third (33.3%) were discharged

249 home, twenty-two (9.9%) patients with AKI died in the emergency and (5.9%) were transferred to other

250 hospitals.

251 The most common immediate cause of death was refractory septic shock (72.7%), hypoxia (22.7%), and

252 massive pulmonary embolism (4.5%).

253 A paired t-test has been conducted to evaluate the impact of AKI treatment on change in laboratory values

254 during emergency admission and upon discharge from emergency. The result showed a significant decrease

255 in creatinine from 4.5mg/dl (SD 4.7) to 3.6 mg/dl (SD 3.8), t-value of 4.3, and p- 0.000. The mean decrement

256 in creatinine was 0.937 mg/dl with a 95% confidence interval ranging from 0.51 to 1.36. There was also a  
 257 significant change in mean sodium increase from 134 (SD 8.9) to 36 (SD 7.5), t-value of -2.7, and p-value of  
 258 0.007. The initial sodium increased with a mean value of 1.5 with a 95% confidence interval ranging from 2.6  
 259 to 0.4.

260 Regarding the WBC count, there was an increase of from 12,219 (SD. 10385) to 13,689 (SD 21,444), t-value  
 261 of -1.06, and p-value of 0.290 with 95% CI ranging from 4203 to 1263. But it was not a significant change as  
 262 the p-value is greater than 0.05. On the other hand, there was a significant change in hemoglobin decrement  
 263 by a mean value of 0.4 mg/dl from the admission value (t-value 3.2, and p-value 0.002 at a 95% CI), ranging  
 264 from 0.15 to 0.65. There was also a significant change in potassium increment with mean value 0.2896, t-  
 265 value of 4.2, and p-value of 0.000 with a 95% CI ranging from 0.12 to 0.42. See Table 6 below.

266 Table 6. Paired T-test of laboratory values of AKI patients presented to the ED of SPHMMC from June 2021 to June 2022.

|        |                                           | Paired Differences |                |            |                                           |          |        | t-value | Difference | Sig. (2-tailed) |
|--------|-------------------------------------------|--------------------|----------------|------------|-------------------------------------------|----------|--------|---------|------------|-----------------|
|        |                                           | Mean               | Std. Deviation | Std. Error | 95% Confidence Interval of the Difference |          |        |         |            |                 |
|        |                                           |                    |                |            | Mean                                      | Lower    | Upper  |         |            |                 |
| Pair 1 | Initial WBC - discharge WBC               | -1469.955          | 20667.410      | 1387.106   | -4203.602                                 | 1263.692 | -1.060 | 221     | .290       |                 |
| Pair 2 | Initial hemoglobin - discharge hemoglobin | .4072              | 1.8815         | .1263      | .1584                                     | .6561    | 3.225  | 221     | .001       |                 |
| Pair 3 | Initial platelet - Discharge platelet     | -9846.396          | 145788.517     | 9784.685   | -29129.62                                 | 9436.832 | -1.006 | 221     | .315       |                 |

|        |                                |        |         |        |        |         |        |     |      |
|--------|--------------------------------|--------|---------|--------|--------|---------|--------|-----|------|
| Pair 4 | Initial BUN -<br>Discharge BUN | 16.128 | 79.504  | 5.336  | 5.613  | 26.644  | 3.023  | 221 | .003 |
| Pair 5 | Initial Cr - Discharge<br>Cr   | .93770 | 3.21683 | .21590 | .51222 | 1.36319 | 4.343  | 221 | .000 |
| Pair 6 | Initial K+ - discharge<br>K+   | .2896  | 1.0242  | .0687  | .1541  | .4251   | 4.213  | 221 | .000 |
| Pair 7 | Initial Na+ -<br>discharge Na+ | -1.533 | 8.436   | .566   | -2.649 | -.418   | -2.708 | 221 | .007 |

## 267 Outcome predictors

268 Binary logistic regression (95% CI with p-value of < 0.05) was implemented to determine the independent  
 269 predictors of mortality among AKI patients. Overall AKI patients' mortality was significantly correlated with  
 270 the presence of uremic encephalopathy, infection, nephrotoxic-antibiotics, malignancy, and low initial GCS.  
 271 As shown in Table 7 below.

272 It was also correlated with discharge potassium level and pulmonary edema solely before adjustment of the  
 273 odds ratio.

274 Table 7. Binary logistic regression analysis between different factors and death in AKI patients presented to the ED of SPHMMC  
 275 from June 2021 to June 2022.

| Death                 |              |         |                   |              |
|-----------------------|--------------|---------|-------------------|--------------|
|                       | COR (95%CI)  | P-value | AOR (95%CI)       | P-Value      |
| Uremic encephalopathy | 12.9(4.6-36) | 0.000   | 17(5-60)          | 0.000        |
| Pulmonary edema       | 2.6(1.1-6.5) | 0.03    | <b>2.1(0.7-6)</b> | <b>0.167</b> |
| Infection             | 4(1.7-11.2)  | 0.001   | 3.2(1.2-8.5)      | 0.017        |

|                         |                |       |                       |              |
|-------------------------|----------------|-------|-----------------------|--------------|
| Discharge K+            | 1.6(1.08-2.5)  | 0.002 | <b>1.54(0.88-2.6)</b> | <b>0.126</b> |
| Nephrotoxic antibiotics | 2.6(1.074-8.7) | 0.035 | 2.7(1.038-7.29)       | 0.042        |
| Malignancy              | 4.1(1.4-11.9)  | 0.007 | 3.5(1.3-9.6)          | 0.012        |
| Initial GCS             | 4.7(2.06-10.9) | 0.000 | 3.7(1.5-9.06)         | 0.003        |

276 Binary logistic regression (95% confidence interval with p-value of < 0.05) was further implemented to  
 277 determine the independent predictors of admission from emergency to the wards or ICU among AKI patients.  
 278 In all AKI patients' admission to the ICU and ward from an emergency was significantly affected by those  
 279 who were taking nephrotoxic antibiotics, patients with hyponatremia, acute glomerulonephritis, and infection  
 280 as shown in table 8 below.

281 Table 8. Binary logistic regression analysis between different factors and admission from ED to ward and ICU in AKI patients  
 282 presented to the ED of SPHMMC from June 2021 to June 2022.

|                          | <b>COR (95%CI)</b> | <b>P-value</b> | <b>AOR (95%CI)</b> | <b>P-value</b> |
|--------------------------|--------------------|----------------|--------------------|----------------|
| Nephrotoxic antibiotics  | 2.5(1.2-4.8)       | 0.007          | 0.24(0.11-0.55)    | 0.001          |
| Infection                | 2.3(1.1-4.3)       | 0.014          | 2.1(1.04-4.3)      | 0.039          |
| Hyponatremia             | 2.1(1.25-3.6)      | 0.005          | 0.45(0.25-0.83)    | 0.011          |
| Acute glomerulonephritis | 0.39(0.20-0.75)    | 0.005          | 0.45(0.22-0.91)    | 0.027          |

## 283 Discussion

284 In the current study, we conducted a cross-sectional study on the clinical profile and outcome of patients with  
 285 acute kidney injury in adult emergency of SPHMMC from June1-2021 to June-1-2022. The most common  
 286 presenting complaints are shortness of breath (20.7%), generalized body swelling (19.8%), and decreased  
 287 urine output (19.37%). the most common identified comorbidities are hypertension (27.2%) and malignancy  
 288 (24.7%). Infection (26.2%), acute glomerulonephritis (20.46%), volume depletion due to diarrhea & other loss  
 289 are the most common presumed causes of AKI. In our study, infection consists of sepsis (78.1%), acute  
 290 pyelonephritis (11.4%) pneumonia (10.3%). Hyponatremia, hyperkalemia, and pulmonary edema are the

291 most common identified complications of AKI identified in the emergency. Nearly half of the patients (50.9%)  
292 were admitted to the wards or ICU from the emergency for further management. Of 222 AKI patients, 22  
293 patients passed away in an emergency with the most common cause of death, septic shock.

294 Most of the published data estimating the incidence of AKI were from high-income countries and included  
295 patients admitted to critical care units; settings where the ability to trace and detect suspected cases remains  
296 high. In a systematic review, the world incidence of AKI among hospitalized adults was estimated to be  
297 21.6%, and the condition was found to be associated with a 23.9% increase in mortality (18)

298 This study elucidated the referral area, presenting vital signs, triage categories, main presenting complaint,  
299 causes, complications, the practice of management, and outcomes of patients with AKI. The presentation of  
300 the patients at a younger age coincided with results from other African countries as well as those done in  
301 Ethiopia (10, 19, 20)

302 Most of our AKI patients are from Addis Ababa and Oromia regions. Most of them were referred from  
303 government health facilities, though there are a few patients referred from private health facilities and self-  
304 referred. The gender proportion of patients is almost 1:1 with a median age of 47 years But, in the previous  
305 study of the same hospital, the mean age was 37 years (16, 19, 21).

306 Forty-nine patients (22.1%) of the study population were over the age of sixty-four in our study, as opposed  
307 to the study conducted by JIMMA Hospital, which included 28% of AKI patients in this age range. AKI-affected  
308 patients who were younger than 65 years old made up more than three-fourths of the total patient population  
309 (22).

310 The most frequent comorbid conditions in our study were hypertension (27.2%), malignancies (24%) diabetes  
311 mellitus (19%), and heart failure (14%). The comorbidities were hypertension (30.5%), HIV (32.6%), and  
312 diabetes (13.3%), which are similar to research conducted in South Africa in 2017. However, research

313 conducted in Uganda found that HIV accounts for 60% of all comorbid conditions (12). This may be due to  
314 lower triggering factors to screen HIV in AKI patients. But, HIV, its complications, and the medications taken  
315 could cause significant renal derangement.

316 The most presenting complaint of AKI patients to the emergency was shortness of breath (20.7%),  
317 generalized body swelling (19.8%), and decreased urine output (19.3%). Our finding was consistent with a  
318 study done in Tanzania emergency (21).

319 The most common cause of AKI identified in our study were infections, acute glomerulonephritis, and  
320 hypovolemia 26%, 20%, and 18.5% respectively. In a previous study done in the same hospital, the  
321 commonest cause identified was hypovolemia. Obstructive uropathy accounts for the fourth most common  
322 cause of AKI in our study, which is similar to studies done in the same city and same setup. But the most  
323 common cause of obstructive uropathy identified in our patients is nephrolithiasis rather than cervical cancer  
324 in the comparative studies done in the same study (10, 19, 22).

325 Regarding AKI-associated complications, hyponatremia (32.5%), hyperkalemia (22.7%), and pulmonary  
326 edema (18.7%) are the most common. Though our findings with hyperkalemia and pulmonary edema are  
327 similar in other studies (21). Hyponatremia was a different finding in our study.

328 Of the all patient enrolled in the study 21% of patients required dialysis, and 62% managed conservatively  
329 with fluids, antibiotics, steroids, and other methods of management for the cause of AKI. The rest 16.6% of  
330 patients were operated on as part of treatment for the underlying cause of AKI. Our finding regarding  
331 management is more or less similar to previous studies done in another hospital of the same city and a study  
332 done in Tanzania, on an emergency set (16, 21).

333 The most common indication for dialysis was refractory fluid overload (57.6%), other uremic complications  
334 (uremic encephalopathy, uremic pericarditis, uremic gastropathy, and uremic bleeding all accounting for 30.7

335 % indication for dialysis) and hyperkalemia (11.5%). As compared to other studies done in a similar city and  
336 the same setup, uremic encephalopathy (72%) is the most common indication for dialysis, followed by  
337 hyperkalemia (27%) and fluid overload (22%). Metabolic acidosis could not be diagnosed in our hospital, as  
338 there is no arterial blood gas analysis (16).

339 Regarding treatment outcome, half (50.9%) of the AKI patients were admitted to the wards or ICU, whereas,  
340 one-third of patients were discharged improved and death outcome accounted for 9.9 %. Around 84% of  
341 patients had elevated initial creatinine on admission to the emergency and 77% of patients were disposed of  
342 with persistently elevated creatinine. Only 23% of patients disposed of resolved AKI from emergency. This  
343 indicates that our result is similar to a study done in Ghana where 70-90% of AKI is community-acquired (20).  
344 The mortality of patients in the study done in Tanzania, emergency set up was 39 % which is high than our  
345 result (21). The same higher result mortality of AKI has been observed study done in TASH which is a tertiary  
346 teaching hospital, in the same capital city. It may be due to the inclusion of AKI in CKD patients (16). The  
347 mortality rate of 9.9% in our study is much lower than the data from a global meta-analysis of studies done  
348 across the globe which has shown a pooled AKI-associated mortality rate of 49.4 % for dialysis requiring AKI  
349 (23). But, the result of our death rate closes the range put in the metanalysis done in Ghana, which puts the  
350 AKI death rate at 11.5-43.5% (20).

351 In our current study uremic encephalopathy, infection, malignancy, potassium at discharge from emergency  
352 and low initial GCS were significantly contributed to death rate. In the other study done in JIMMA, the duration  
353 of AKI, the severity of AKI, and hyperkalemia were associated with the death rate (22).

354 Similarly, a study done in Sudan showed that increased age, the severity of AKI, presence of sepsis and liver  
355 disease all contributed to increased mortality in AKI patients (18).



356 In the same manner, binary logistic regression showed that the presence of nephrotoxic antibiotics, infection,  
357 and hyponatremia significantly contributed to admission rate to the wards and ICU.

## 358 **Conclusion and Recommendation**

359 Most developing countries showed similarities in the AKI pattern we analyzed. AKI was primarily a  
360 community-acquired condition in most of our patients. Infections, acute glomerulonephritis, and hypovolemia  
361 are the most frequent causes of AKI at Saint Paul's Hospital millennium medical college. Pneumonia (10.3%),  
362 pyelonephritis (11.4%), and sepsis (78.1%) were the three most prevalent conditions among the patients,  
363 with a fatality rate of 9.9%. Over 50% of patients with AKI were admitted to the wards or ICU. Significant  
364 mortality predictors included uremic encephalopathy, infection, malignancy, and low GCS at presentation.

365 So health care providers should focus on the prevention strategies for the most common contributors of AKI  
366 development, mortality, complications, and causes of admission to decrease the health institutions burden of  
367 care.

## 368 **Strength and limitation**

### 369 **Strengths**

370 The study assessed clinical patterns and outcomes of AKI patients in adult emergency and we tried to  
371 formulate an association between outcomes and predictors affecting outcomes by regression analysis.

### 372 **Limitations**

373 This is a single-center cross-sectional observational hospital-based study and the results cannot be  
374 generalized to the general population.

### 375 **Declarations**

376 **Ethical consideration**

377 The St. Paul's Hospital Millennium Medical College Institutional Review Board in Addis Ababa provided  
378 ethical clearance and permission for this study with Ref. No. pm23/11. The Department of EMCC & Research  
379 Directorate sent a letter of authorization to the medical record unit requesting access to and examination of  
380 the patient charts. No names or other personal information was utilized in the data collection to ensure  
381 confidentiality. The need for informed consent and publication was waived by SPHMMC IRB due to the  
382 retrospective nature of data collection.

383 **Conflict of interest**

384 None.

385 **Source of funding**

386 Funding was not received for this research, but logistic expenses were covered by Saint Paul's Hospital  
387 Millennium Medical College.

388 **Data availability**

389 Data were presented without restriction and available upon request to the corresponding author.

390 **Consent to publish**

391 Not applicable.

392 **Acknowledgments**

393 I would want to express my profound gratitude to SPHMMC's department of emergency and critical care  
394 medicine for providing me with the opportunity to carry out my research. I would like to express my profound  
395 gratitude for my advisors for their insightful output throughout this research.

396 Last but not least, I want to express my thanks to my parents and my beloved wife for their unwavering  
397 support and bravery.

## 398 **References**

- 399 1. Khwaja A. KDIGO clinical practice guidelines for acute kidney injury. *Nephron Clinical Practice*.  
400 2012;120(4):c179-c84.
- 401 2. KDIGO clinical practice guideline for the care of kidney transplant recipients. *American journal of*  
402 *transplantation: official journal of the American Society of Transplantation and the American Society of*  
403 *Transplant Surgeons*. 2009;9 Suppl 3:S1-155.
- 404 3. Mehta RL, Kellum JA, Shah SV, Molitoris BA, Ronco C, Warnock DG, et al. Acute Kidney Injury  
405 Network: report of an initiative to improve outcomes in acute kidney injury. *Critical care (London, England)*.  
406 2007;11(2): R31.
- 407 4. Judith. *tintinallis emergency medicine*2018. 2159 p.
- 408 5. Ja M, Hockberger R, Walls R. *Rosen's emergency medicine: concepts and clinical practice*2010.
- 409 6. Barry R, James MT. Guidelines for classification of acute kidney diseases and disorders. *Nephron*.  
410 2015;131(4):221-6.
- 411 7. Makris K, Spanou L. Acute kidney injury: definition, pathophysiology and clinical phenotypes. *The*  
412 *clinical biochemist reviews*. 2016;37(2):85.
- 413 8. Li PK, Burdmann EA, Mehta RL. Acute kidney injury: global health alert. *Kidney international*.  
414 2013;83(3):372-6.
- 415 9. Mesic E, Aleckovic-Halilovic M, Pjanic M, Hodzic E, Dugonjic-Taletovic M, Halilcevic A, et al. Recent  
416 Pattern of Acute Kidney Injury in Bosnia and Herzegovina. *Medical Archives*. 2019;73(4):276.

- 417 10. Caballo B, Khogali M, Khalifa E, Khalil E, El-Hassan A, Abu-Aisha H. Patterns of "Severe Acute  
418 Renal Failure" in a referral center in Sudan: Excluding intensive care and major surgery patients. Saudi  
419 Journal of Kidney Diseases and Transplantation. 2007;18(2):220-5.
- 420 11. Cerdá J, Lameire N, Eggers P, Pannu N, Uchino S, Wang H, et al. Epidemiology of acute kidney  
421 injury. Clinical journal of the American Society of Nephrology. 2008;3(3):881-6.
- 422 12. Bagasha P, Nakwagala F, Kwizera A, Ssekasanvu E, Kalyesubula R. Acute kidney injury among  
423 adult patients with sepsis in a low-income country: clinical patterns and short-term outcomes. BMC  
424 Nephrology. 2015;16(1):4.
- 425 13. Feehally J. The ISN 0by25 Global Snapshot Study. Annals of nutrition & metabolism. 2016;68 Suppl  
426 2:29-31.
- 427 14. Saint paul.s hospital millennium medical college. historical background of hospital and college:  
428 SPHMMC; 2022 [Available from: <https://sphmmc.edu.et>].
- 429 15. Ahmed MM, Tedla FM, Leichtman AB, Punch JD. Organ transplantation in Ethiopia. Transplantation.  
430 2019;103(3):449-51.
- 431 16. Kefyalew M, Azazh A, Siraw BB, Teklu A, Seid A, Admasu TN. Clinical Profile and Outcome of Acute  
432 Kidney Injury: A Prospective Cross-sectional Study at a Tertiary Hospital in Addis Ababa, Ethiopia. 2021.
- 433 17. Abebe A, Kebede B, Woobie Y. Clinical Profile and Short-Term Outcomes of Acute Kidney Injury in  
434 Patients Admitted to a Teaching Hospital in Ethiopia: A Prospective Study. Int J Nephrol Renovasc Dis.  
435 2021;14:201-9.
- 436 18. Yousif DE, Topping AR, Osman MF, Raimann JG, Osman EM, Kotanko P, et al. Acute Kidney Injury  
437 in Sub-Sahara Africa: A Single-Center Experience from Khartoum, Sudan. Blood Purification. 2018;45(1-  
438 3):201-7.

- 439 19. Ibrahim A, Ahmed MM, Kedir S, Bekele D. Clinical profile and outcome of patients with acute kidney  
440 injury requiring dialysis—an experience from a hemodialysis unit in a developing country. *BMC Nephrology*.  
441 2016;17(1):1-5.
- 442 20. Riley S, Diro E, Batchelor P, Abebe A, Amsalu A, Tadesse Y, et al. Renal impairment among acute  
443 hospital admissions in a rural Ethiopian hospital. *Nephrology (Carlton, Vic)*. 2013;18(2):92-6.
- 444 21. Sylvanus E, Sawe HR, Muhanuzi B, Mulesi E, Mfinanga JA, Weber EJ, et al. Profile and outcome of  
445 patients with emergency complications of renal failure presenting to an urban emergency department of a  
446 tertiary hospital in Tanzania. *BMC Emergency Medicine*. 2019;19(1):11.
- 447 22. Belay M, Kebede B, Woobie Y. Mortality and predictors of acute kidney injury in adults: a hospital-  
448 based prospective observational study. 2021:91.
- 449 23. Susantitaphong P, Cruz DN, Cerda J, Abulfaraj M, Alqahtani F, Koulouridis I, et al. World Incidence  
450 of AKI: A Meta-Analysis. *Clinical Journal of the American Society of Nephrology*. 2013;8(9):1482-93.

451
